# Supplementary material for: Complex structure of the fission yeast SREBP-SCAP binding domains reveals an oligomeric organization
Source: PubMed Central journal article supplement — Cell Res. 2016 Nov 4;26(11):1197–211. doi: 10.1038/cr.2016.123 (PMC5099872; doi:10.1038/cr.2016.123), 2016-11-04
Supplement: cr2016123x2.pdf [file cr2016123x2.pdf]

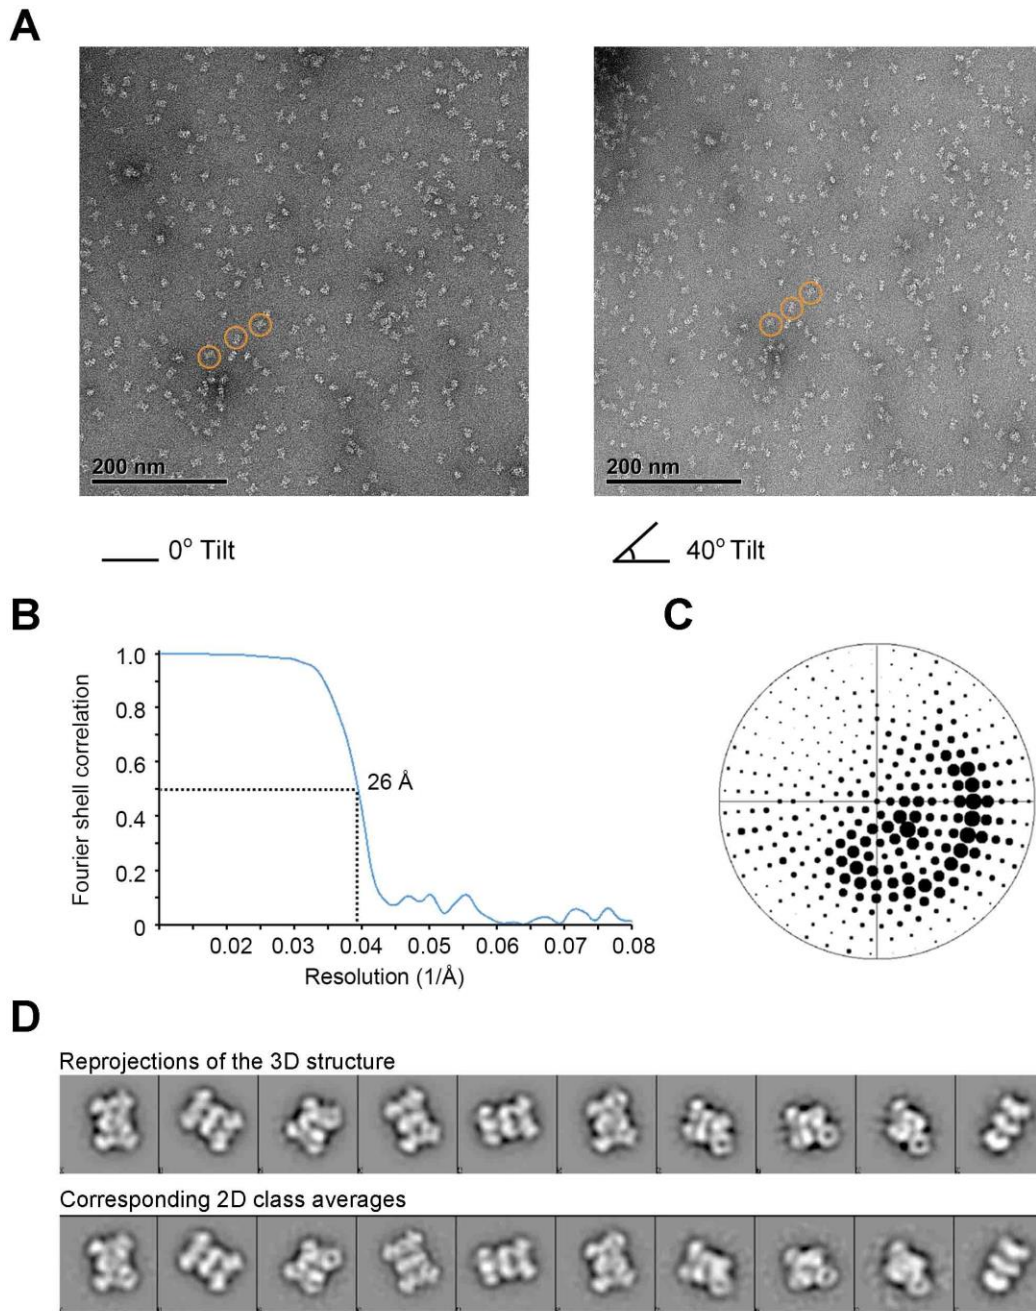

**Supplementary information, Figure S2** *Ab initio* negative staining EM

reconstruction of the Sre1-CTD/Scp1-WD40 complex.

(A) Representative untilted and 40° tilt-pair micrographs (68,000 $\times$  magnification).

The pairs of corresponding particles are indicated by yellow circles. (B) Final resolution was estimated to 26 Å using the Fourier shell correlation criterion with a cutoff of 0.5.

(C) Euler distribution plot of the complex particles, where the size of circle corresponds to the relative number of views for that projection.

(D) Comparison between the reprojections of the final model and the corresponding 2D class averages.
