# Supplementary material for: Complex structure of the fission yeast SREBP-SCAP binding domains reveals an oligomeric organization
Source: PubMed Central journal article supplement — Cell Res. 2016 Nov 4;26(11):1197–211. doi: 10.1038/cr.2016.123 (PMC5099872; doi:10.1038/cr.2016.123), 2016-11-04
Supplement: cr2016123x3.pdf [file cr2016123x3.pdf]

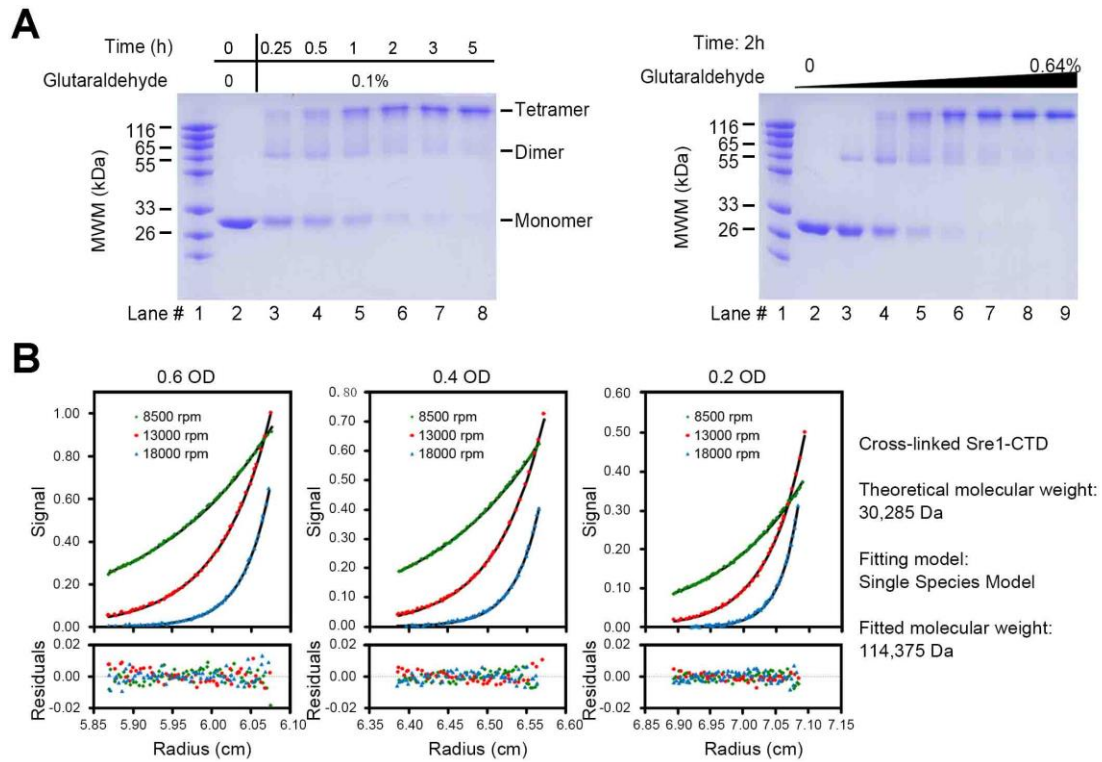

**Supplementary information, Figure S3** Verification of the tetrameric organization of Sre1-CTD.

(A) Crosslinking of Sre1-CTD with glutaraldehyde. *Left panel:* Time course of Sre1-CTD crosslinking catalyzed by 0.1% glutaraldehyde. *Right panel:* Crosslinking of Sre1-CTD with increasing concentration of glutaraldehyde for 2 hours. (B) Sedimentation equilibrium AUC (AUC-SE) analysis of the crosslinked Sre1-CTD. The crosslinked Sre1-CTD oligomer fits into a single species model with a measured molecular weight of approximately 114 kDa, corresponding to a stable tetramer.
