# Supplementary material for: Complex structure of the fission yeast SREBP-SCAP binding domains reveals an oligomeric organization
Source: PubMed Central journal article supplement — Cell Res. 2016 Nov 4;26(11):1197–211. doi: 10.1038/cr.2016.123 (PMC5099872; doi:10.1038/cr.2016.123), 2016-11-04
Supplement: cr2016123x4.pdf [file cr2016123x4.pdf]

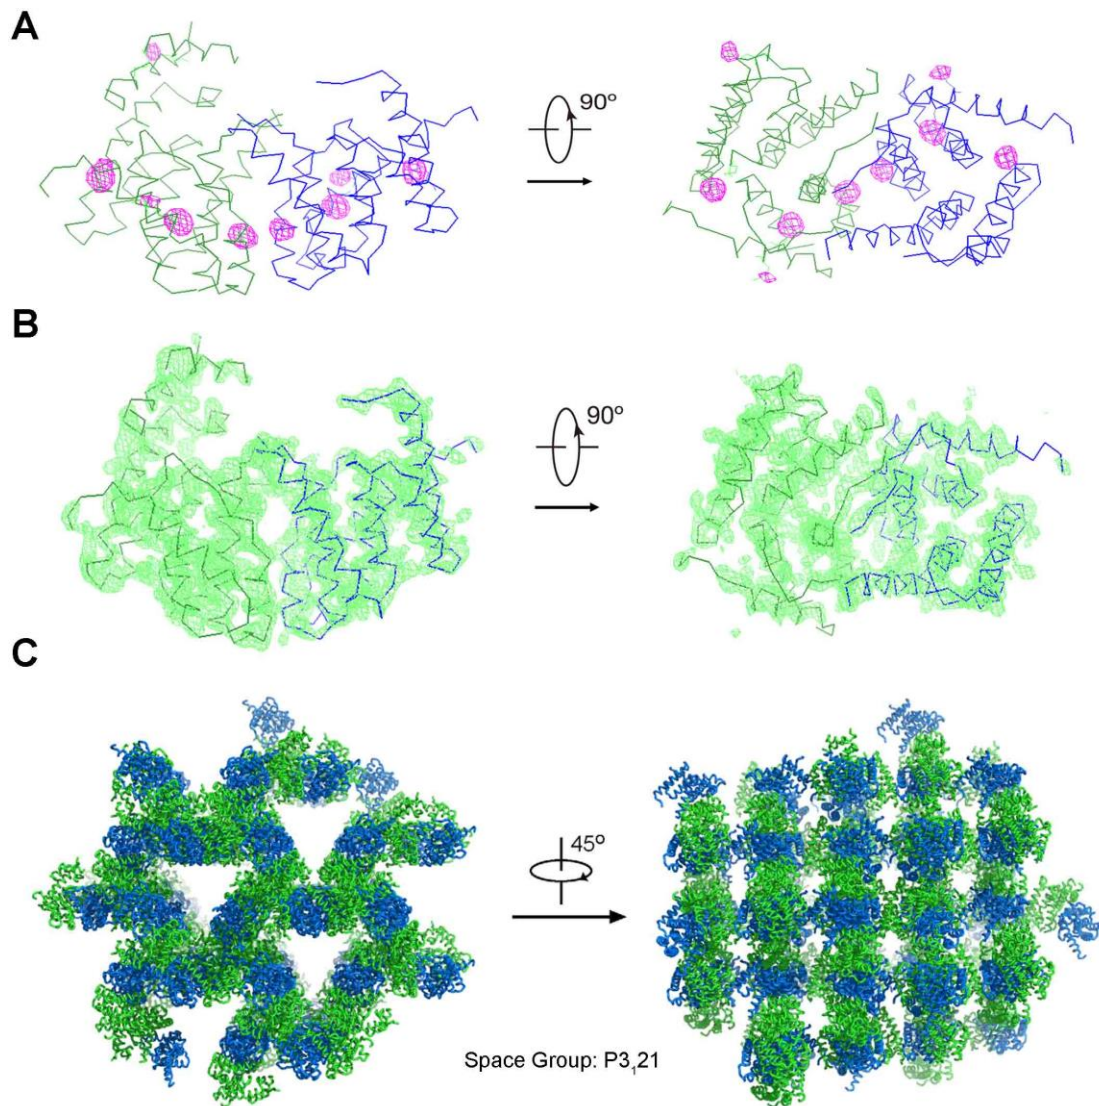

**Supplementary information, Figure S4** Structural determination of the Sre1-CTD.

(A) The anomalous signal for selenium (Se). The structure was determined using Se-single anomalous diffraction (Se-SAD). The anomalous signals for Se, shown as magenta mesh, were contoured at  $4.0 \sigma$ . (B) Electron density map of Sre1-CTD. The  $2F_o - F_c$  electron density map for Sre1-CTD, shown in green mesh, was contoured at  $1.0 \sigma$ . (C) Two views of the crystal packing of Sre1-CTD in the space group of P3<sub>1</sub>21. The two molecules in each asymmetric unit are colored blue and green.
