# Supplementary material for: Complex structure of the fission yeast SREBP-SCAP binding domains reveals an oligomeric organization
Source: PubMed Central journal article supplement — Cell Res. 2016 Nov 4;26(11):1197–211. doi: 10.1038/cr.2016.123 (PMC5099872; doi:10.1038/cr.2016.123), 2016-11-04
Supplement: cr2016123x5.pdf [file cr2016123x5.pdf]

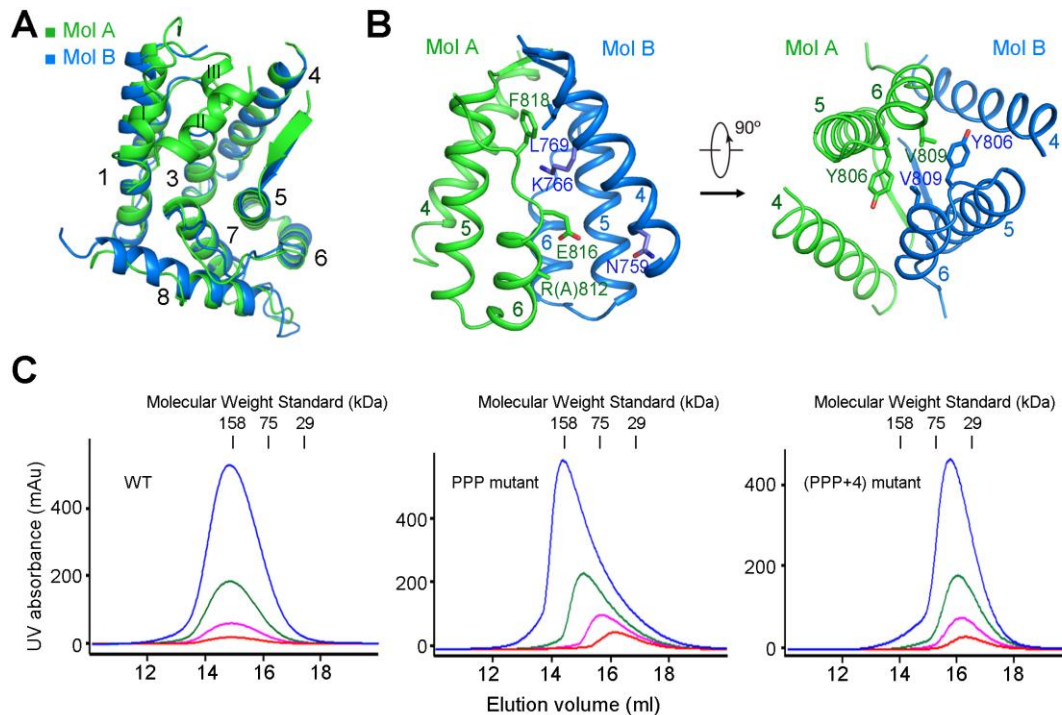

**Supplementary information, Figure S5** The dimer interface of Sre1-CTD.

(A) The two Sre1-CTD molecules in each asymmetric unit adopt almost identical conformations. Shown here is a structure overlay of these two molecules, with a pair-wise root-mean-squared deviation (RMSD) of approximately 0.63 Å over 133 C $\alpha$  atoms. (B) The dimer interface of Sre1-CTD in two perpendicular views. (C) Concentration-dependent size exclusion chromatography (SEC) of WT (left), PPP mutant (middle) and the (PPP+4) mutant (right) of Sre1-CTD. The oligomerization state of the PPP mutant appears to be concentration-dependent, whereas the (PPP+4) mutant remains a monomer even at high protein concentration.
