# Supplementary material for: Complex structure of the fission yeast SREBP-SCAP binding domains reveals an oligomeric organization
Source: PubMed Central journal article supplement — Cell Res. 2016 Nov 4;26(11):1197–211. doi: 10.1038/cr.2016.123 (PMC5099872; doi:10.1038/cr.2016.123), 2016-11-04
Supplement: cr2016123x7.pdf [file cr2016123x7.pdf]

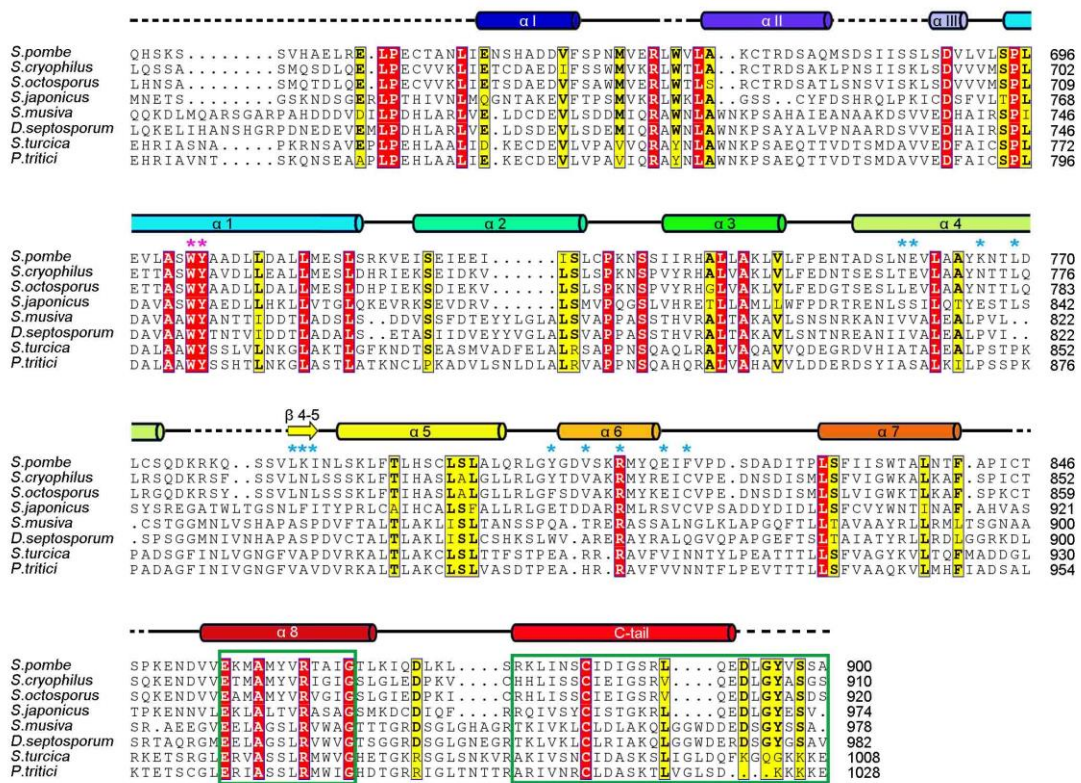

**Supplementary information, Figure S7** Sequence alignment of the Sre1-CTD from eight closely-related species.

Invariant and highly conserved amino acids are shaded in red and yellow, respectively. The secondary structural elements are indicated above the sequences. The structural core of Sre1-CTD comprises eight  $\alpha$  helices ( $\alpha$ 1-8). The three N-terminal  $\alpha$  helices are designated  $\alpha$ I-III. The  $\alpha$ 8 and C-tail helices, which are crucial for Scp1 binding, are indicated by the green box. The residues involved in dimerization and tetramerization are indicated above the sequences by purple and blue asterisks, respectively. The listed Sre1 homologs, from top to bottom, include those from *Schizosaccharomyces cryophilus*, GI: 528318978; *Schizosaccharomyces octosporus*, GI: 528061682; *Schizosaccharomyces japonicus*, GI: 213408737; *Sphaerulina musiva*, GI: 453089017; *Dothistroma septosporum*, GI: 452848144; *Setosphaeria turcica*, GI: 636581033; *Pyrenophora tritici*, GI:189207771.
